# Supplementary material
Source: PubMed Central journal article supplement (PMC4006196)

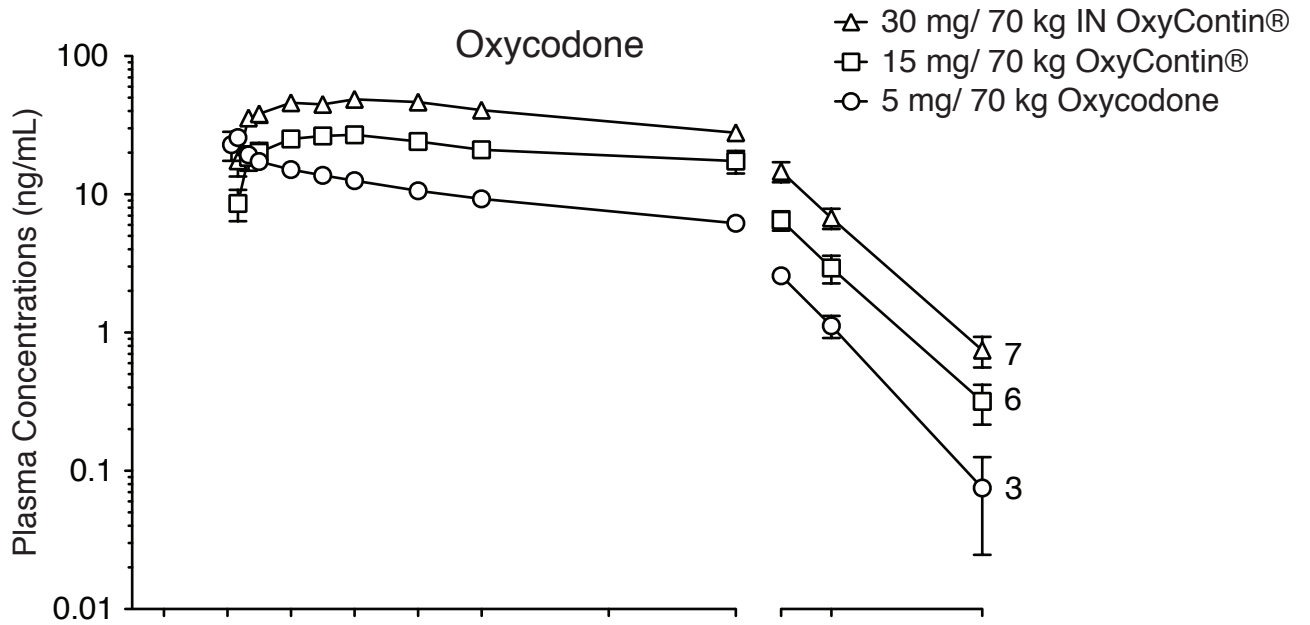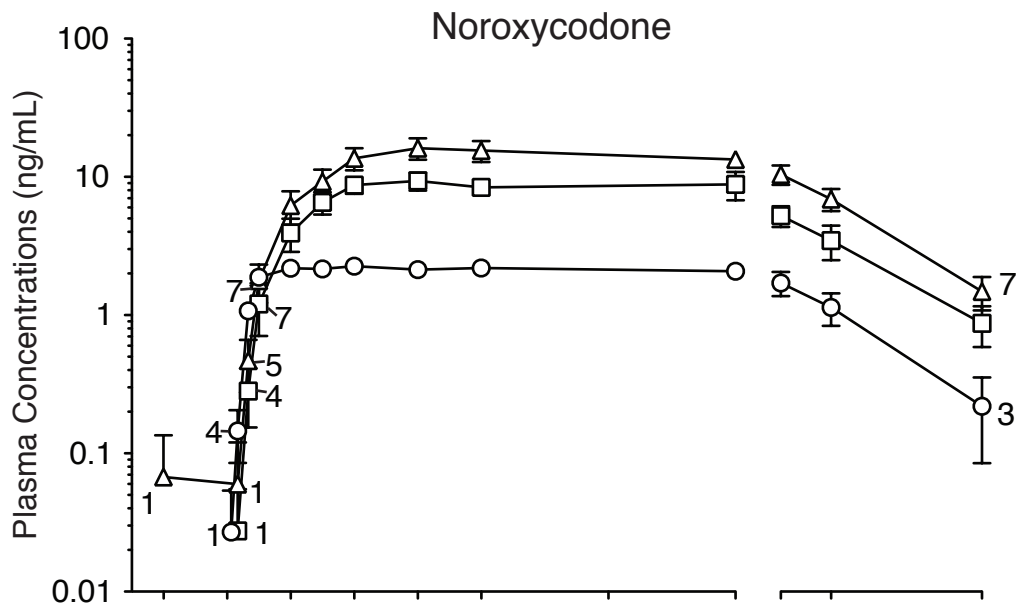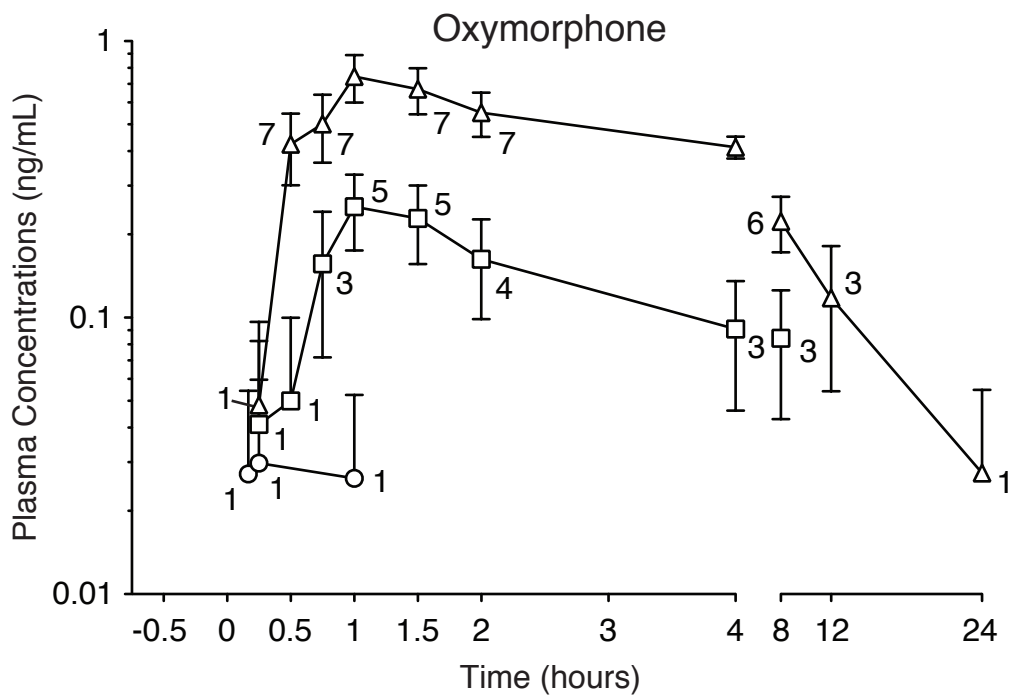

Supplement: NIHMS570621-supplement-Figure.pdf [file NIHMS570621-supplement-Figure.pdf]
